# Supplementary material for: Management of patients with early-stage colon cancer: guidelines of the Italian Medical Oncology Association
Source: PubMed Central journal article supplement — ESMO Open. 2020 Dec 1;5(6):e001001. doi: 10.1136/esmoopen-2020-001001 (PMC7709518; doi:10.1136/esmoopen-2020-001001), 2020-12-01
Supplement: esmoopen-2020-001001supp001.pdf [file esmoopen-2020-001001supp001.pdf]

## Supplementary files

**Supplementary Table 1** List of external independent reviewers, including their affiliations and scientific society

| Name                  | Affiliation                                                                                                                                      | Scientific society |
|-----------------------|--------------------------------------------------------------------------------------------------------------------------------------------------|--------------------|
| Carlo Aschele         | Oncologia Medica - ASL 5 Liguria – La Spezia                                                                                                     | AIOM               |
| Andrea Scalisi        | ASP 6 – Palermo                                                                                                                                  | SIMG               |
| Fabio Monica          | Gastroenterologia ed Endoscopia Digestiva - Azienda Sanitaria Universitaria Integrata di Trieste , Ospedale Universitario di Cattinara – Trieste | AIGO               |
| Francesco Di Costanzo | Oncologia Medica - Azienda Ospedaliero Universitaria Careggi - Firenze                                                                           | AIOM               |
| Alfredo Falcone       | Oncologia Medica - Azienda Ospedaliero Universitaria Pisana - Pisa                                                                               | AIOM               |
| Roberto Labianca      | Oncologia - Azienda Ospedaliero Giovanni XXIII - Bergamo                                                                                         | AIOM               |
| Giovanni Lanza        | Anatomia Patologica - Arcispedale S. Anna - Azienda Ospedaliero Universitaria - Ferrara                                                          | SIAPEC             |
| Francesco Tonelli     | Chirurgia - Università degli Studi di Firenze - Firenze                                                                                          | SICO               |
| Vincenzo Valentini    | Gemelli ART – Fondazione “Policlinico A. Gemelli” - Roma                                                                                         | AIRO               |
| Alberto Zaniboni      | Oncologia - Fondazione Poliambulanza - Brescia                                                                                                   | AIOM               |
| Maurizio Genuardi     | Istituto Medicina Genomica - Università Cattolica S. Cuore – Roma                                                                                | SIGU               |
| Francesca Coppola     | Dipartimento di Diagnostica e Medicina preventiva -Policlinico S. Orsola-Malpighi – Bologna                                                      | SIRM               |
